# Supplementary material
Source: PubMed Central journal article supplement (PMC6499244)
Supplement: bty843_supplementary_table.pdf [file bty843_supplementary_table.pdf]

## Supplementary Table 1. QuagmiR online resources and documentation

|                                                                                                                                                                                                                               |
|-------------------------------------------------------------------------------------------------------------------------------------------------------------------------------------------------------------------------------|
| <b>QuagmiR code repository</b>                                                                                                                                                                                                |
| Main page with the source code for local deploy of QuagmiR                                                                                                                                                                    |
| <a href="https://github.com/Gu-Lab-RBL-NCI/QuagmiR">https://github.com/Gu-Lab-RBL-NCI/QuagmiR</a>                                                                                                                             |
|                                                                                                                                                                                                                               |
| <b>QuagmiR Wiki</b>                                                                                                                                                                                                           |
| Detailed guidelines, documentation and example tutorials on how to run QuagmiR                                                                                                                                                |
| <a href="https://github.com/Gu-Lab-RBL-NCI/QuagmiR/wiki">https://github.com/Gu-Lab-RBL-NCI/QuagmiR/wiki</a>                                                                                                                   |
|                                                                                                                                                                                                                               |
| <b>QuagmiR on the Cancer Genomics Cloud</b>                                                                                                                                                                                   |
| Step-by-step guidelines on how to run QuagmiR on the Cancer Genomics Cloud                                                                                                                                                    |
| <a href="https://github.com/Gu-Lab-RBL-NCI/QuagmiR/wiki/QuagmiR-on-the-Seven-Bridges-Cancer-Genomics-Cloud-(CGC)">https://github.com/Gu-Lab-RBL-NCI/QuagmiR/wiki/QuagmiR-on-the-Seven-Bridges-Cancer-Genomics-Cloud-(CGC)</a> |
|                                                                                                                                                                                                                               |
| <b>QuagmiR Motif Files</b>                                                                                                                                                                                                    |
| Reference motif files for the 250 organisms reported in miRBase v22                                                                                                                                                           |
| <a href="https://github.com/Gu-Lab-RBL-NCI/QuagmiR/tree/master/Motifs">https://github.com/Gu-Lab-RBL-NCI/QuagmiR/tree/master/Motifs</a>                                                                                       |
|                                                                                                                                                                                                                               |
| <b>QuagmiR Motif File Scripts</b>                                                                                                                                                                                             |
| Scripts to generate reference motif files                                                                                                                                                                                     |
| <a href="https://github.com/Gu-Lab-RBL-NCI/QuagmiR/wiki/Running-script-to-generate-unique-motifs-from-miRBase">https://github.com/Gu-Lab-RBL-NCI/QuagmiR/wiki/Running-script-to-generate-unique-motifs-from-miRBase</a>       |
|                                                                                                                                                                                                                               |
| <b>Benchmark reads and scripts</b>                                                                                                                                                                                            |
| Scripts and synthetic reads used to benchmark QuagmiR                                                                                                                                                                         |
| <a href="https://github.com/Gu-Lab-RBL-NCI/QuagmiR/wiki/Benchmark-QuagmiR">https://github.com/Gu-Lab-RBL-NCI/QuagmiR/wiki/Benchmark-QuagmiR</a>                                                                               |
|                                                                                                                                                                                                                               |
| <b>QuagmiR Docker images</b>                                                                                                                                                                                                  |
| <a href="https://github.com/Gu-Lab-RBL-NCI/QuagmiR/wiki/QuagmiR-Docker-images">https://github.com/Gu-Lab-RBL-NCI/QuagmiR/wiki/QuagmiR-Docker-images</a>                                                                       |
| <a href="https://dockstore.org/containers/images.sbgenomics.com/nikola_testic/quagmir">https://dockstore.org/containers/images.sbgenomics.com/nikola_testic/quagmir</a>                                                       |
| <a href="https://hub.docker.com/r/testic/quagmir/">https://hub.docker.com/r/testic/quagmir/</a>                                                                                                                               |
